# Supplementary material for: Site-1 protease regulates skeletal stem cell population and osteogenic differentiation in mice
Source: Oxford University Press journal article supplement (doi:10.1242/bio.032094), 2018-01-01
Supplement: bio032094supp.pdf [file bio032094supp.pdf]

**SUPPLEMENTAL MATERIALS**

**SUPPLEMENTAL FIGURES**

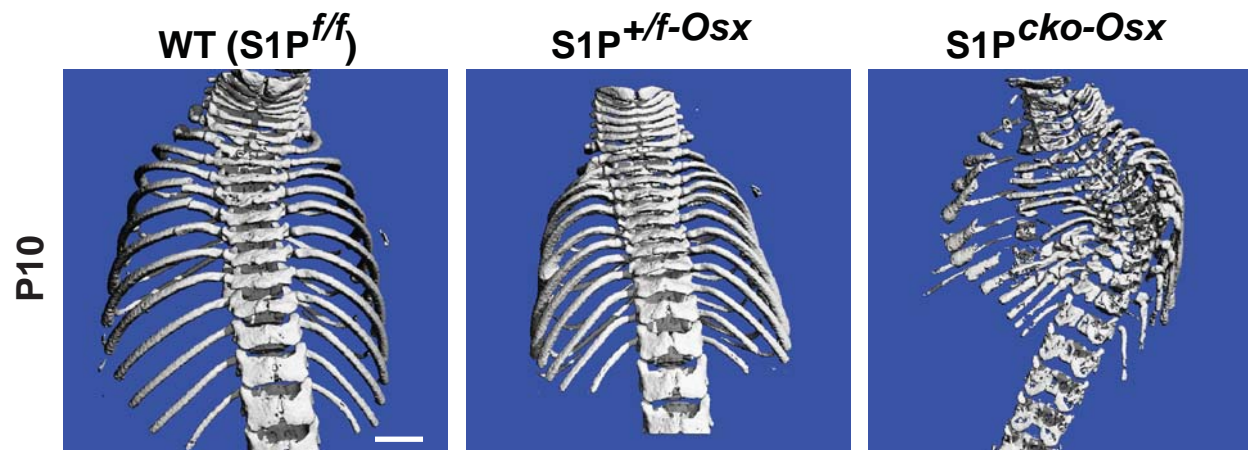

**Supplemental Figure 1.** Images from  $\mu$ CT scans of P10 WT (S1P<sup>f/f</sup>), S1P<sup>+/f-Osx</sup> (Het) and S1P<sup>cko-Osx</sup> (Cko) mice showing scoliosis in S1P<sup>cko-Osx</sup>. Bar: 2.5 mm.

**A. P1**

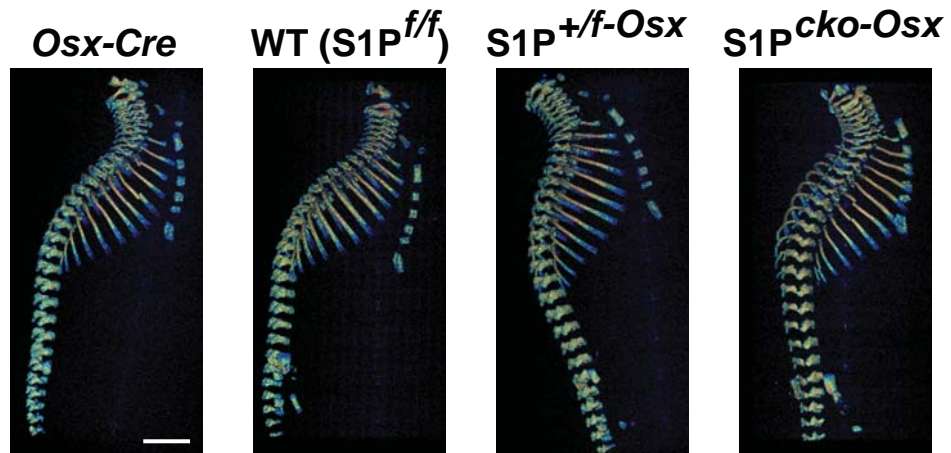

**B. P5**

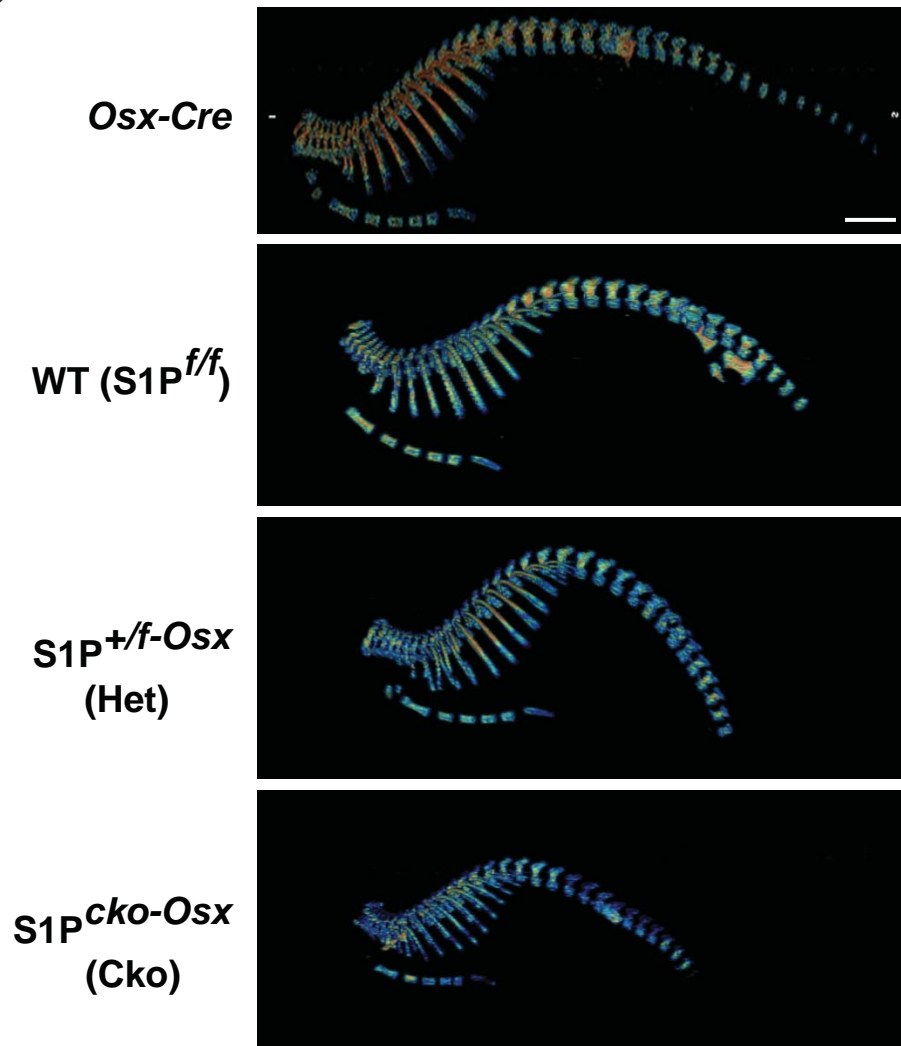

**Supplemental Figure 2.** Scanned  $\mu$ CT images of mice axial skeletons were processed by OsiriX software and Jet color scheme using a window location of 1440 and window width of 1890 to create bone mineral density (BMD) heat maps in P1 (**A**) and P5 (**B**) *Osx-Cre*, WT ( $S1P^{ff}$ ),  $S1P^{+/f-Osx}$  (Het) and  $S1P^{cko-Osx}$  (Cko) mice. A typical representation of BMD heat maps from studies of several litters is shown. Bar (A, B): 2.5 mm.

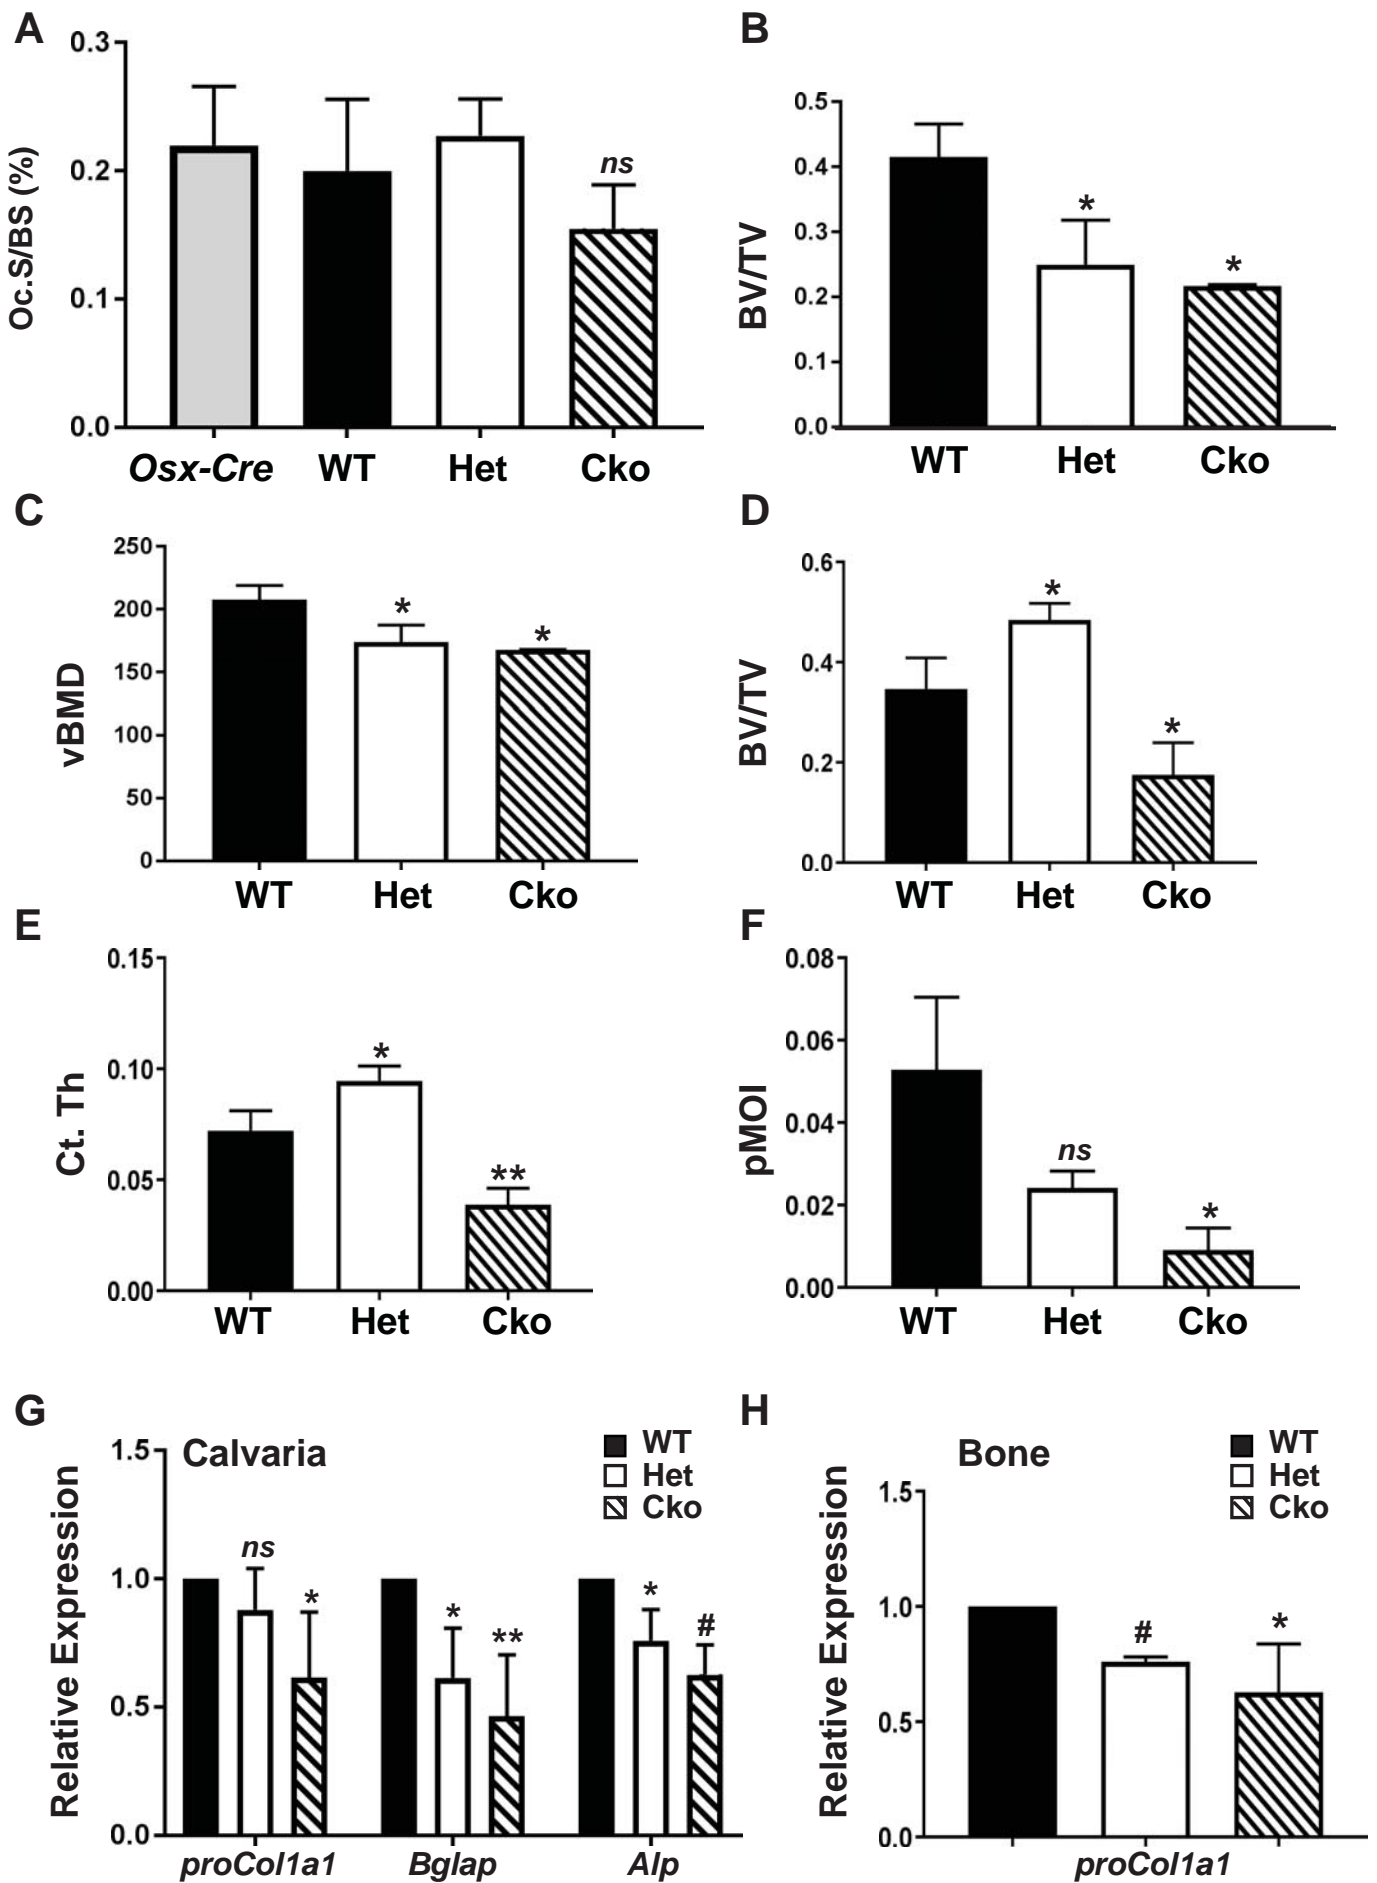

**Supplemental Figure 3.** (A) Dynamic histomorphometric measurement of osteoclast surface/bone surface (Oc.S/BS) (mean  $\pm$  s.d.; N=5) for P21 *Osx-Cre*, WT, Het and Cko mice ( $P = ns$  (not significant)). Morphological analysis from  $\mu$ CT scans for the metaphyseal trabecular bone in the distal femora (B, C) and mid-diaphyseal cortical bone (D-F) in P7 mice (mean  $\pm$  s.d.; N=3; \* $P < 0.05$ , \*\* $P < 0.01$ , or  $ns$  when compared to WT). (BV: bone volume; TV: tissue volume; vBMD: volumetric bone mineral density in milligrams of hydroxyapatite per cubic centimeter; Ct. Th: cortical thickness; pMOI: polar moment of inertia as a measure of resistance to torsional force). Q-PCR analysis for *proColla1*, *Bglap*, and *Alp* with RNA harvested from P21 calvaria (G) and long bones (femur/tibia with bone marrow flushed out) (H) (mean  $\pm$  s.d.; N=3, \* $P < 0.05$ , \*\* $P < 0.01$ , # $P < 0.005$  or  $ns$ , when compared to WT).

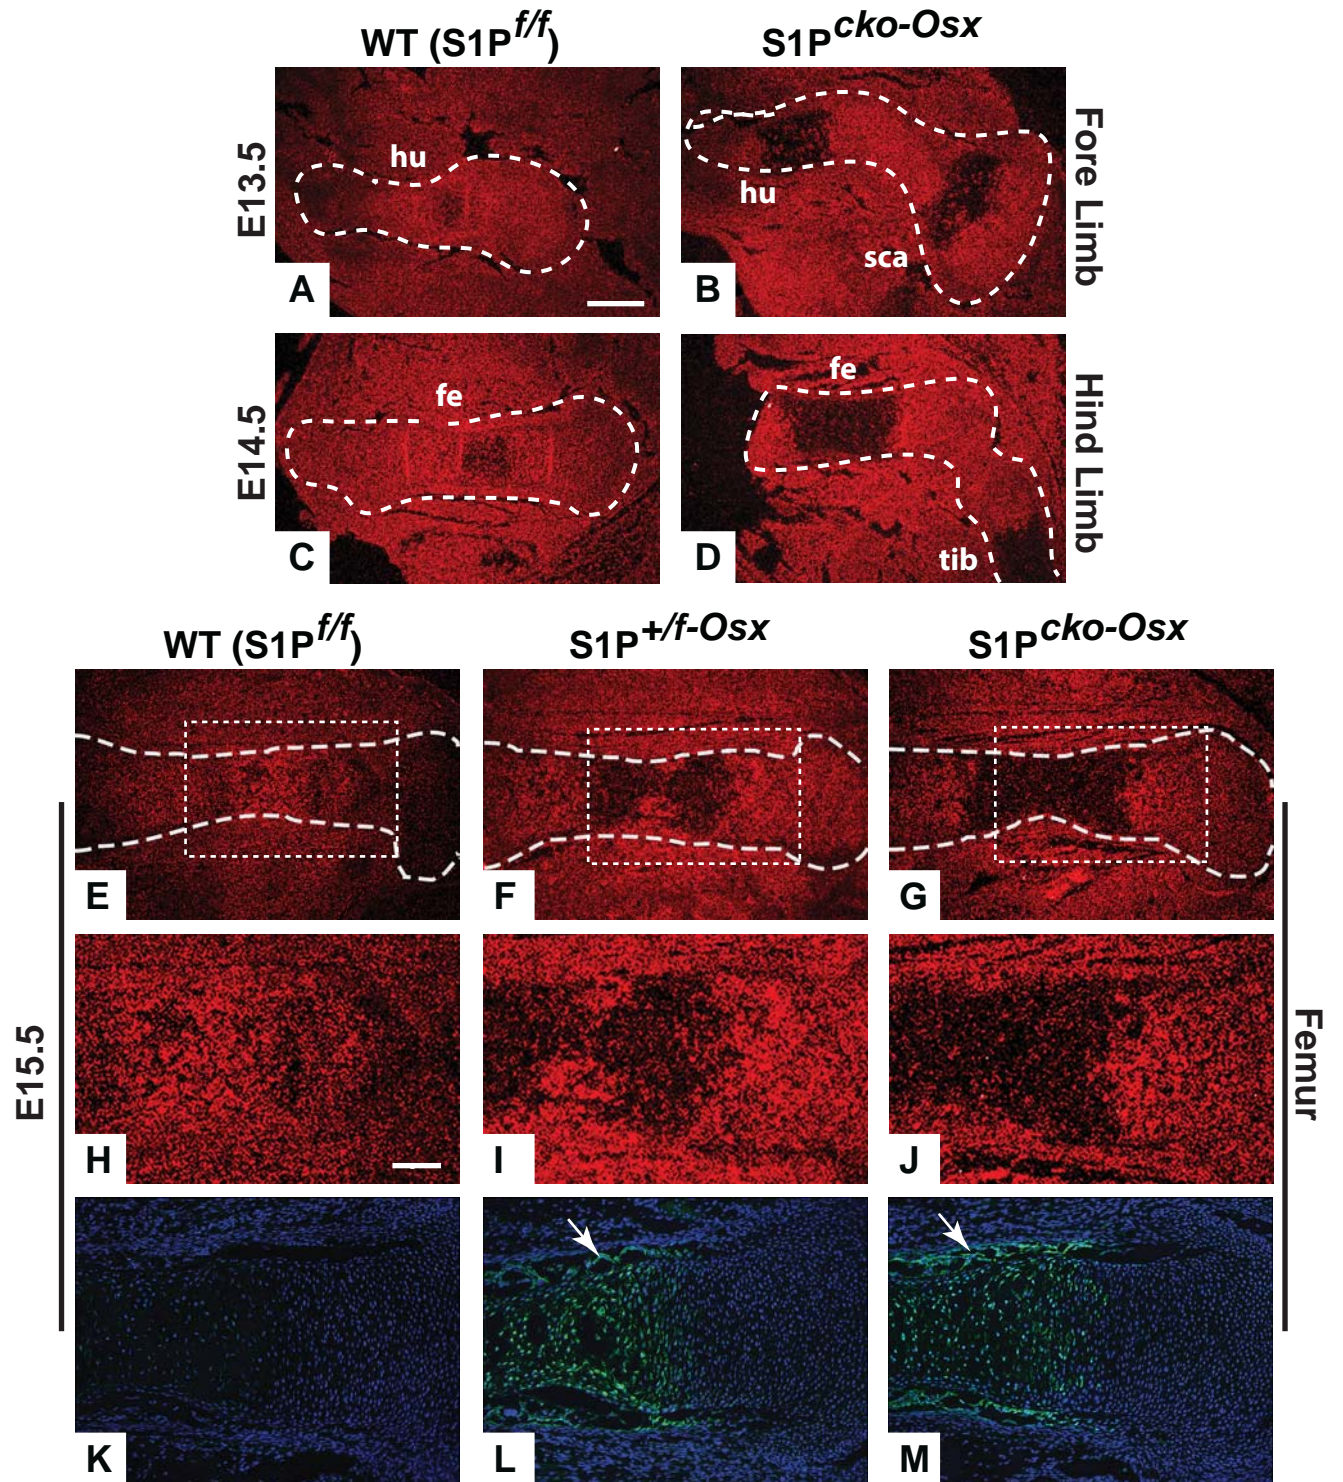

**Supplemental Figure 4.** (A-G) *In situ* hybridization analysis for *Mbtps1-exon 2* at E13.5 (A and B, in fore limb) and E14.5 (C and D, in hind limb) in WT and S1P<sup>cko-Osx</sup> mice, and at E15.5 in WT, S1P<sup>+/-Osx</sup> and S1P<sup>cko-Osx</sup> mice (E-G, femur). Signals from *Mbtps1-exon 2* are shown in red. Notice the loss of expression in the pre-hypertrophic/hypertrophic zones in the growth plate (hu: humerus; sca: scapula; fe: femur; tib: tibia). Panels H-J are higher magnification images of panels E-G of the region demarcated by the dashed rectangle and are shown in the same magnification as panels K-M. (K-M) GFP expression (due to expression of the GFP-Cre fusion protein from the *Sp7 (Osx)* promoter) in E15.5 femora in S1P<sup>+/-Osx</sup> (Het) and S1P<sup>cko-Osx</sup> (Cko) mice, absent in WT, showing the tissue distribution of *Osx-Cre* activity and its overlap with *Mbtps1-exon2* ablation (E-J). Arrow points to GFP expression in the perichondrium indicating *Mbtps1-exon 2* deletion in perichondrial bone progenitors. Bar (A-G): 250  $\mu$ m; (H-M): 100  $\mu$ m.

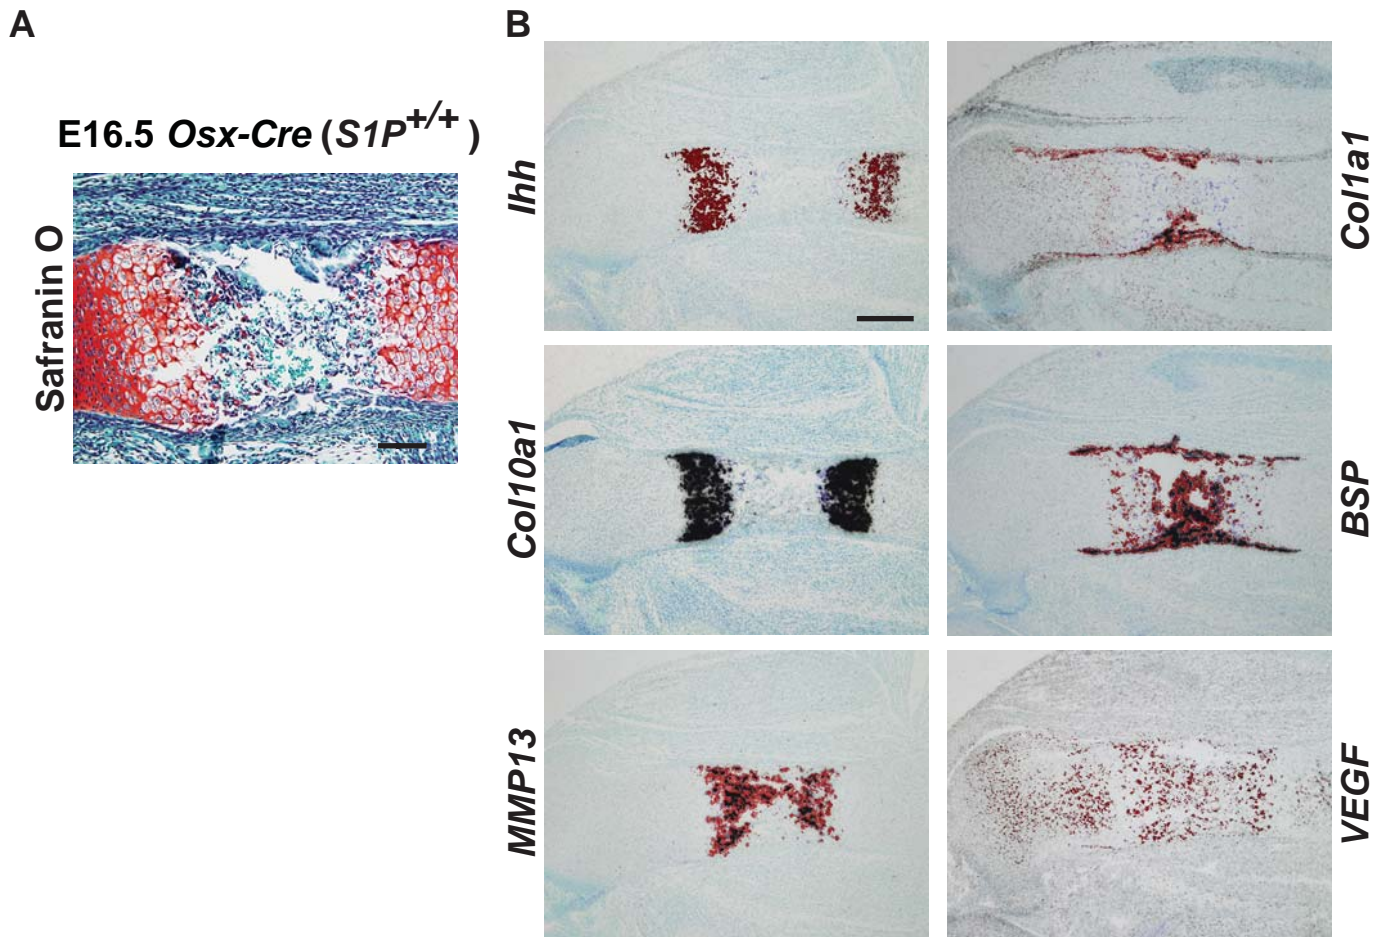

**Supplemental Figure 5.** (A) Safranin O, Fast green, and hematoxylin stained femur from a control *Osx-Cre* (*S1P*<sup>+/+</sup>) mouse at E16.5. Bar: 100  $\mu$ m. (B) *In situ* hybridization analyses in *Osx-Cre* control mouse in E16.5 femur for *Ihh*, *Col10a1*, *MMP13*, *Col1a1*, *BSP*, and *VEGF*. Bar (all panels): 250  $\mu$ m.



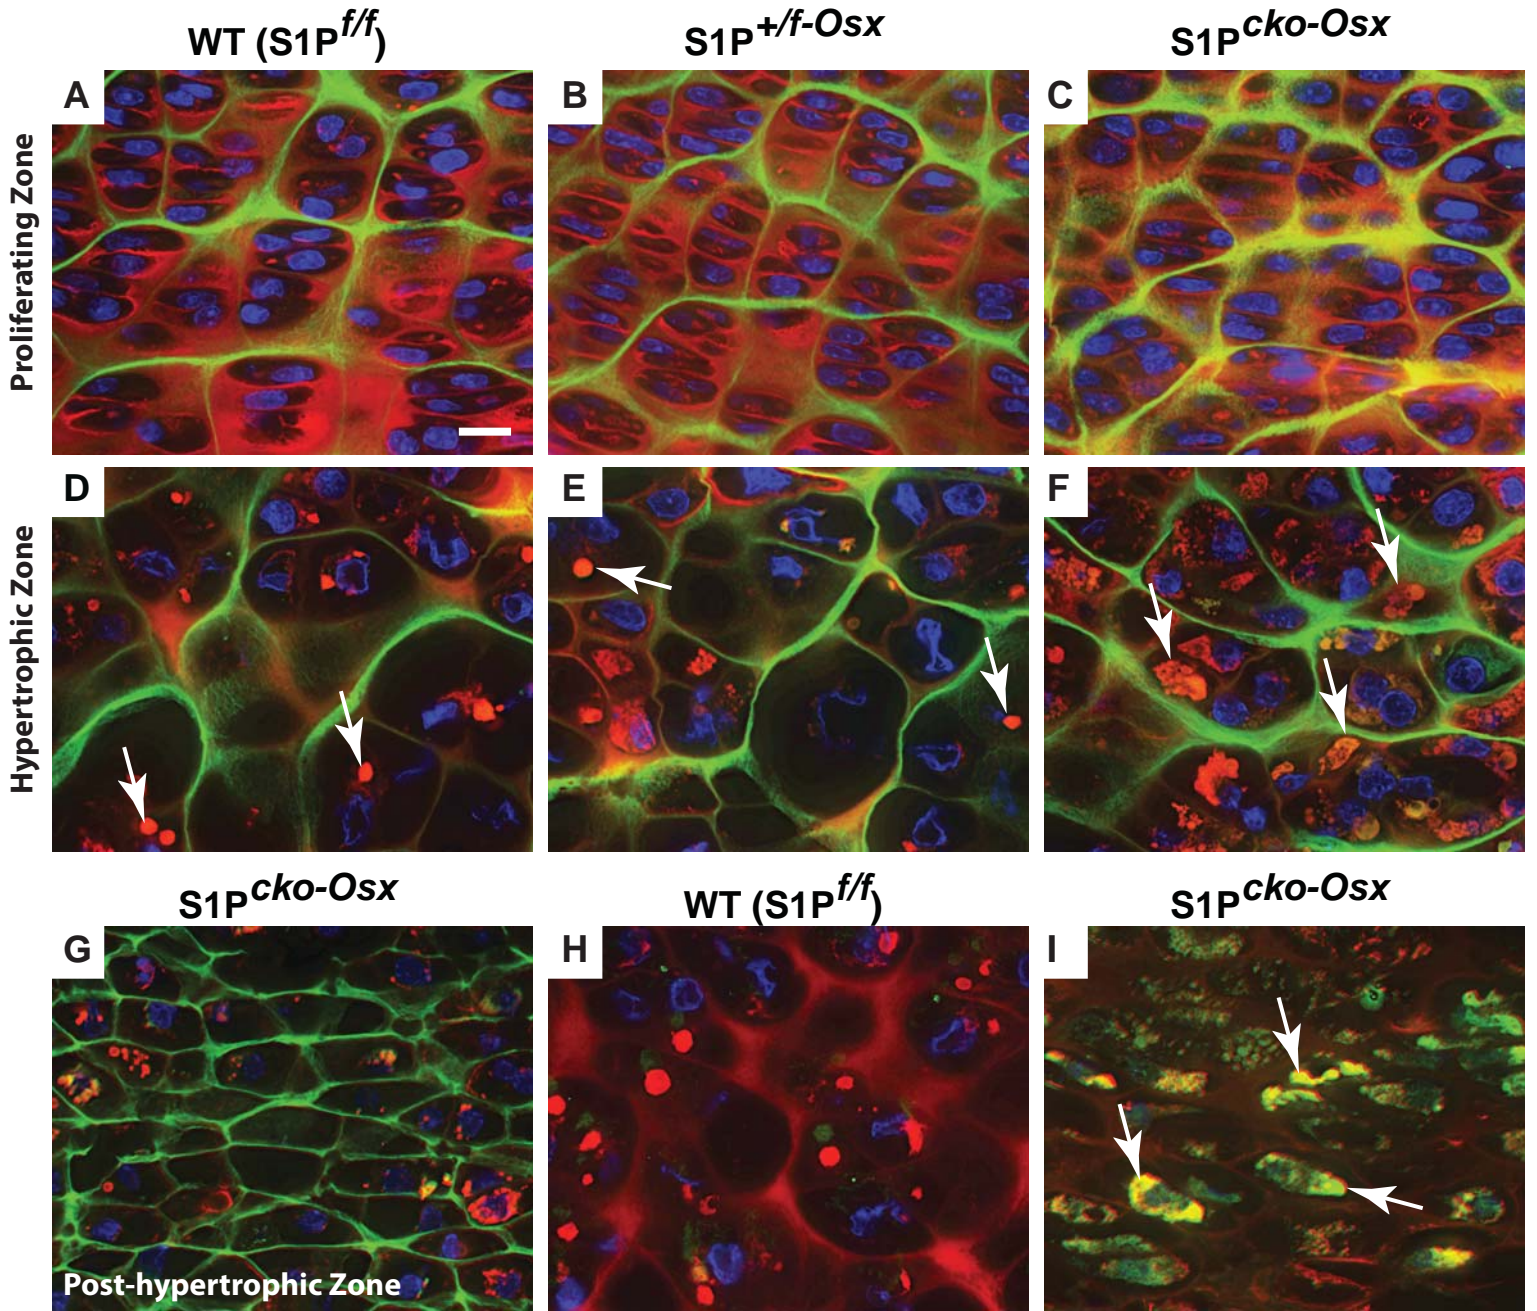

**Supplemental Figure 6.** Entrapment of pro-Col IIB in the pre-hypertrophic/hypertrophic chondrocytes in  $S1P^{cko-Osx}$ . **(A-G)** Double-labeled immunofluorescence for Col II THD (red) and Col IIA (green) in E16.5 femora in WT **(A, D)**,  $S1P^{+/f-Osx}$  **(B, E)** and  $S1P^{cko-Osx}$  **(C, F)** are shown for proliferating cells **(A-C)**, pre-hypertrophic/hypertrophic chondrocytes **(D-F)**, and the post-hypertrophic zone **(G,  $S1P^{cko-Osx}$  only)**. Arrows point to Col II THD clumps in WT **(D)** and  $S1P^{+/f-Osx}$  **(E)** hypertrophic matrix, or the intracellularly trapped Col II in  $S1P^{cko-Osx}$  **(F)**. **(H, I)** Double-labeled immunofluorescence for pro-Col IIB (green) and Col II THD (red) in E16.5 femora in WT **(H)** and  $S1P^{cko-Osx}$  **(I)**. Arrows **(I)** point to yellow colocalization signals from pro-Col IIB and THD indicating pro-Col IIB entrapment. Bar (all panels): 10  $\mu\text{m}$ .

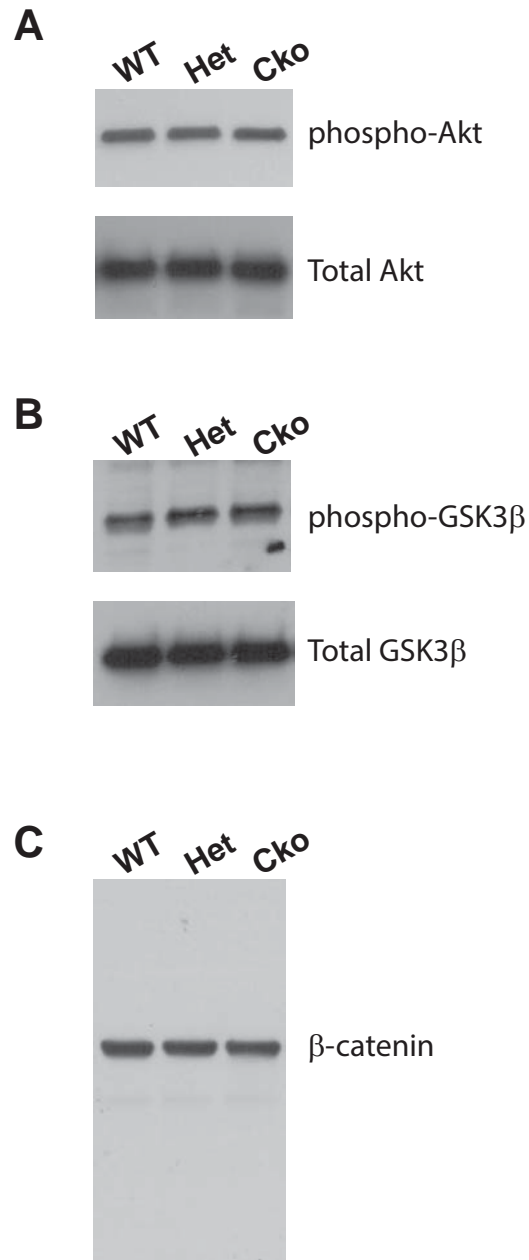

**Supplemental Figure 7.** Immunoblot analysis of Wnt/ $\beta$ -catenin signaling components in embryonic bone. E14.5 forelimbs were harvested from WT,  $S1P^{+/-Osx}$  (Het) and  $S1P^{cko-Osx}$  (Cko) mice, proteins extracted and equal amounts of limb lysates loaded and analyzed by western blot with the antibodies indicated.

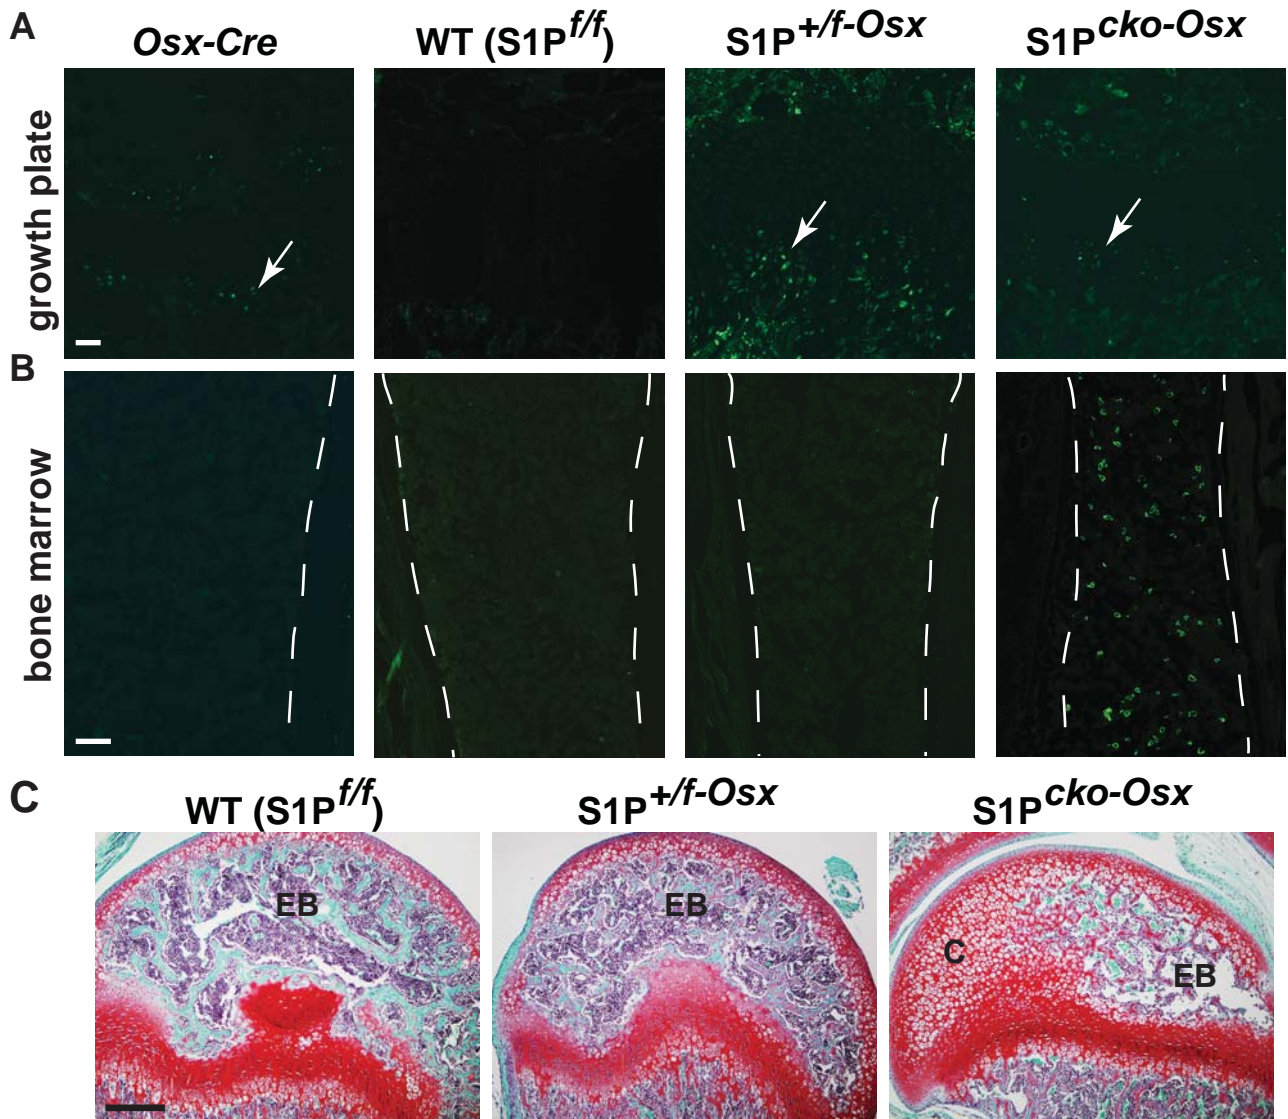

**Supplemental Figure 8.** Distribution of GFP<sup>+</sup> cells in the growth plate (A) and bone marrow (B) in P21 *Osx-Cre*, WT (*S1P<sup>f/f</sup>*), *S1P<sup>+f-Osx</sup>* (Het) and *S1P<sup>cko-Osx</sup>* (Cko) mice. Dashed lines show the junction of bone marrow with cortical bone. Arrows point to the location of GFP<sup>+</sup> cells in the pre-hypertrophic/hypertrophic zone of the growth plates. (C) Safranin O stained sections from P21 mice showing the secondary ossification center in the proximal humerus. Notice the smaller size of the humeral head in *S1P*-ablated mice and the incomplete removal of cartilage in *S1P<sup>cko-Osx</sup>* (C: cartilage; EB: epiphyseal bone). Bar (A): 50  $\mu$ m; (B): 100  $\mu$ m; (C): 250  $\mu$ m.
